# Supplementary material
Source: PubMed Central journal article supplement (PMC3816358)
Supplement: NIHMS512034-supplement-Supplemental.pdf [file NIHMS512034-supplement-Supplemental.pdf]

## Supporting Information

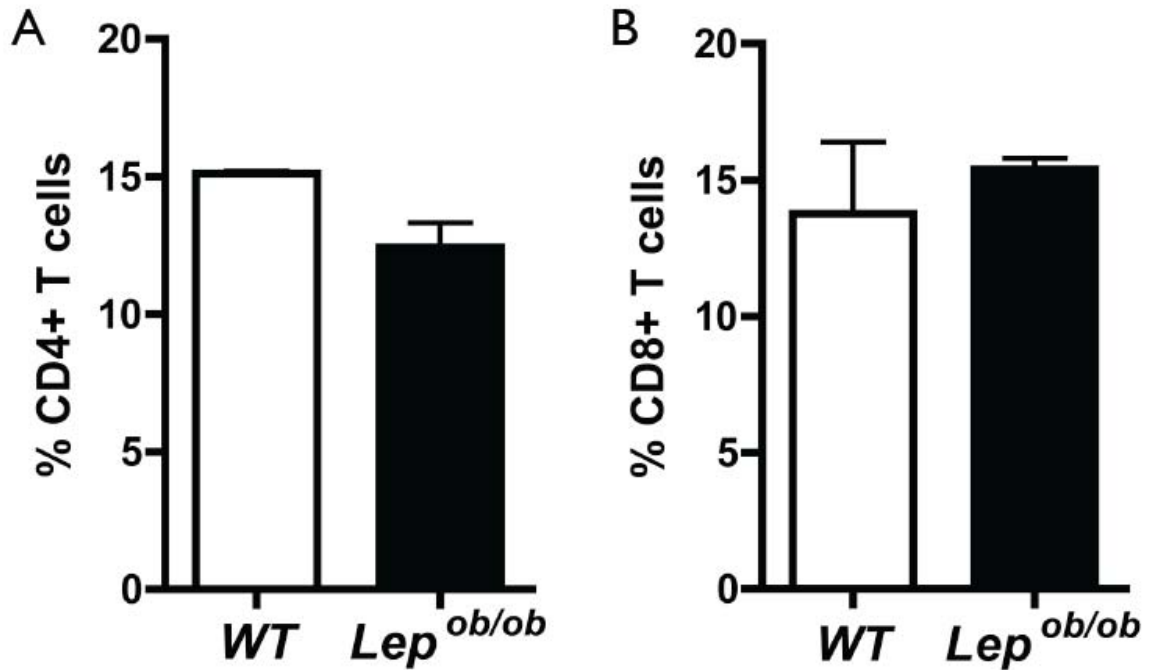

**Figure S1: Frequency of lymph node CD4<sup>+</sup> and CD8<sup>+</sup> T cells in the lymph nodes of nonmanipulated B6 *Lep<sup>ob/ob</sup>* and control mice.** The cells from the draining lymph nodes were obtained, stained with anti-CD4 (A) and anti-CD8 (B) monoclonal antibodies and analyzed by flow cytometry (n = 5 mice/group). Data are representative of two independent experiments. The results are shown as the mean  $\pm$  SEM. No statistical differences were observed among the groups.

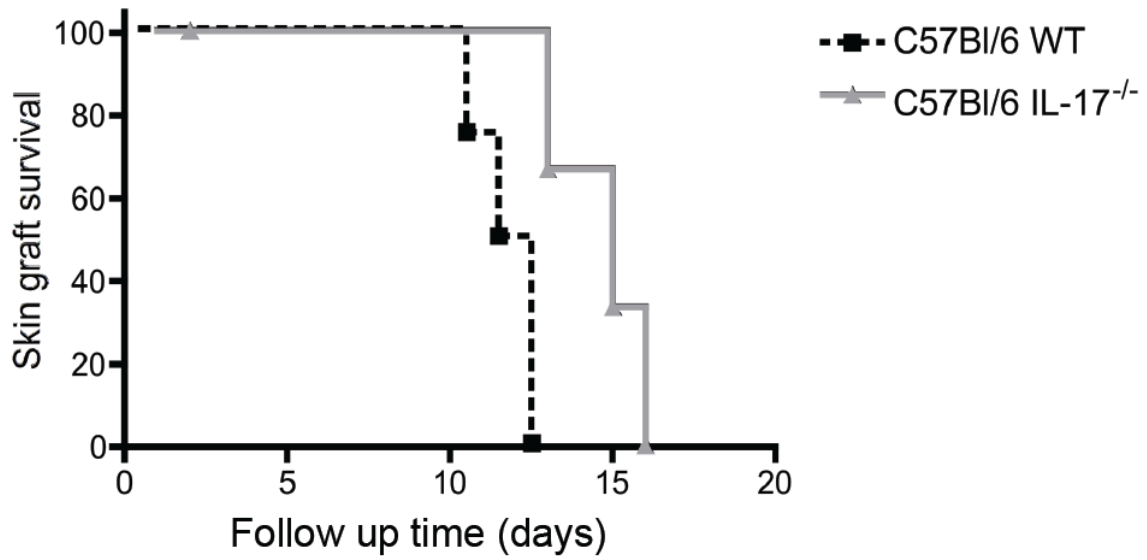

**Figure S2: IL-17 does not influence fully mismatched skin allograft survival.** CBA skin was transplanted onto normal or IL-17 KO B6 mice. Signs of allograft rejection were monitored daily, and survival is reported for individual animals as the time of graft rejection (n = 4 animals/group). The data are representative of two independent experiments.

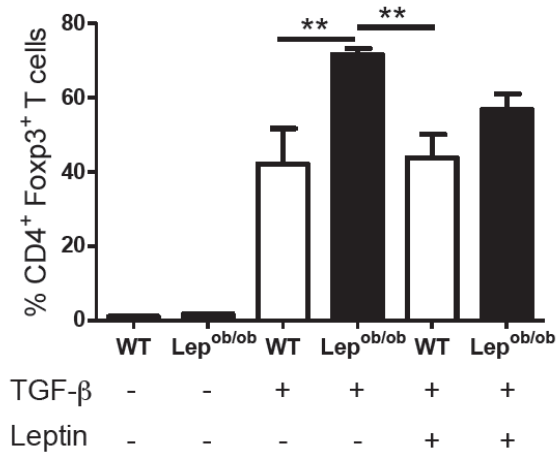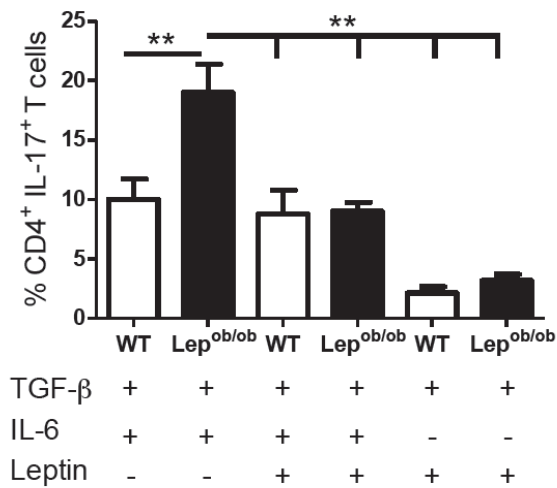

**Figure S3: Tregs and Th17 cells from Lep<sup>ob/ob</sup> naïve T cells are more effectively induced than those from WT naïve T cells.** Naïve (CD4<sup>+</sup>CD62L<sup>+</sup>CD44<sup>-</sup>CD25<sup>-</sup>) T cells from wild-type or Lep<sup>ob/ob</sup> B6 mice were cultured for 5 days in the presence or absence of TGF-β, IL-6 and leptin. Treg and Th17 differentiation of naïve CD4<sup>+</sup> T cells from WT and Lep<sup>ob/ob</sup> mice. The induction of Foxp3<sup>+</sup> CD4<sup>+</sup> T cells and IL-17<sup>+</sup> CD4<sup>+</sup> T cells was evaluated through the intracellular staining of Foxp3 and IL-17, respectively. The data are representative of three independent experiments. Lep<sup>ob/ob</sup>: CD4<sup>+</sup> T cells from Lep<sup>ob/ob</sup> cultured in the absence of leptin; Lep<sup>ob/ob</sup>Lep: CD4<sup>+</sup> T cells from Lep<sup>ob/ob</sup> cultured in the presence of recombinant leptin; WT: CD4<sup>+</sup> T cells from wild-type mice. Data are represented from three independent experiments. The results are shown as the mean ± SEM. \*\*p < 0.01.

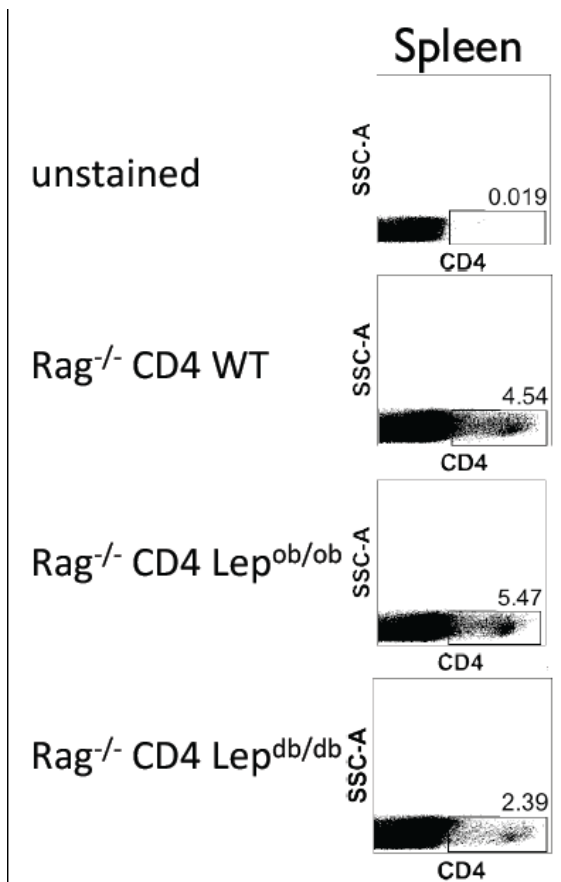

**Figure S4: CD4<sup>+</sup> T cell frequency in RAG<sup>-/-</sup> skin-transplanted mice.** A total of  $5 \times 10^6$  purified CD4<sup>+</sup> T cells from wild-type, Lep<sup>ob/ob</sup> or Lep<sup>db/db</sup> mice were transferred to skin-grafted RAG<sup>-/-</sup> mice. At the time of the last graft rejection, the lymph nodes were obtained and stained with an anti-CD4 antibody. The cells were analyzed by flow cytometry. The data are representative of two independent experiments. (n = 3 mice/group).
